# Supplementary material for: Highly emissive Sb3+-doped Rb2InCl5·H2O perovskites: cost-effective synthesis, luminescence, and its application
Source: Royal Society of Chemistry journal article supplement (doi:10.1039/d3tc02165c), 2023-01-01
Supplement: d3tc02165c1.pdf [file d3tc02165c1.pdf]

## Supporting Information

# Highly Emissive Sb<sup>3+</sup>-doped Rb<sub>2</sub>InCl<sub>5</sub>·H<sub>2</sub>O perovskites: Cost-effective Synthesis, Luminescence, and its Application

Fan Chen,<sup>a</sup> Xiao-Jun Wang,<sup>a,\*</sup> Wenhao Bai,<sup>b</sup> Xuehu Zhang,<sup>b</sup> Wen Hao,<sup>b</sup>

Changhua Zhang,<sup>a</sup> Tongtong Xuan<sup>b,\*</sup>

<sup>a</sup>*Jiangsu Key Laboratory of Advanced Laser Materials and Devices, School of Physics and  
Electronic Engineering, Jiangsu Normal University, Xuzhou 221116, Jiangsu, P. R. China*

<sup>b</sup>*Fujian Key Laboratory of Surface and Interface Engineering for High Performance Materials,  
College of Materials, Xiamen University, Xiamen 361005, Fujian, P. R. China*

*\*Corresponding authors.*

*E-mail addresses: wang.xiaojun@jsnu.edu.cn (X.-J.W.), ttxuan@xmu.edu.cn (T. X)*

**Table S1 Main parameters of the  $x\text{Sb}^{3+}:\text{Rb}_2\text{InCl}_5\cdot\text{H}_2\text{O}$  perovskites.**

| $x\text{Sb}^{3+}:\text{Rb}_2\text{InCl}_5\cdot\text{H}_2\text{O}$ | Cell parameters (Å) |        |        | Cell volume (Å <sup>3</sup> ) |
|-------------------------------------------------------------------|---------------------|--------|--------|-------------------------------|
|                                                                   | a                   | b      | c      |                               |
| 0%                                                                | 14.1861             | 9.8878 | 7.3153 | 1026.11                       |
| 5%                                                                | 14.1911             | 9.9128 | 7.3065 | 1027.83                       |
| 10%                                                               | 14.1801             | 9.9198 | 7.3105 | 1028.32                       |
| 20%                                                               | 14.1769             | 9.9208 | 7.3150 | 1028.83                       |
| 30%                                                               | 14.1879             | 9.9211 | 7.3071 | 1028.54                       |
| 40%                                                               | 14.2049             | 9.9079 | 7.3144 | 1029.43                       |
| 50%                                                               | 14.2178             | 9.8790 | 7.3383 | 1030.72                       |
| 60%                                                               | 14.2212             | 9.8891 | 7.3361 | 1031.71                       |

**Table S2 Summary of the important parameters of red-emission lead-free perovskites.**

| Compounds                                                           | Doping Ions      | Emission Peak  | PLQYs | Experimental Method            | Reference |
|---------------------------------------------------------------------|------------------|----------------|-------|--------------------------------|-----------|
| Cs <sub>2</sub> NaInCl <sub>6</sub>                                 | Mn <sup>2+</sup> | 610 nm         | 16%   | Hydrothermal Method            | 54        |
|                                                                     | Mn <sup>2+</sup> | 610 nm         | 5%    |                                | 65        |
| Cs <sub>2</sub> AgInCl <sub>6</sub>                                 | Mn <sup>2+</sup> | 632 nm         | 3-5%  | Precipitation Method           | 58        |
|                                                                     | Mn <sup>2+</sup> | 620 nm         | 16%   | Hot-injection Method           | 61        |
| Cs <sub>2</sub> NaBiCl <sub>6</sub>                                 | Mn <sup>2+</sup> | 590 nm         | 15%   | Solution Method                | 27        |
|                                                                     | Ag <sup>+</sup>  | 613 nm         | 20%   |                                |           |
|                                                                     | Mn <sup>2+</sup> | 585 nm         | 3.9%  |                                |           |
|                                                                     | Eu <sup>3+</sup> | 591 nm, 615 nm | 3.3%  |                                |           |
| Cs <sub>2</sub> NaIn <sub>x</sub> Bi <sub>1-x</sub> Cl <sub>6</sub> | Mn <sup>2+</sup> | 614 nm         | 44.6% | Hot-injection Method           | 55        |
| Cs <sub>4</sub> CdBi <sub>2</sub> Cl <sub>12</sub>                  | Mn <sup>2+</sup> | 605 nm         | 56.6  | Hydrothermal Method            | 56        |
| Cs <sub>2</sub> AgBiCl <sub>6</sub>                                 | In <sup>3+</sup> | 570 nm         | 36.6% | Anti-solvent recrystallization | 63        |
|                                                                     | Na <sup>+</sup>  | 610 nm         | 45%   | Hydrothermal Method            | 59        |
| CsMnBr <sub>3</sub>                                                 | -                | 643 nm         | 54%   | Hot-injection Method           | 53        |
| Cs <sub>2</sub> InBr <sub>5</sub> ·H <sub>2</sub> O                 | Sb <sup>3+</sup> | 695 nm         | 35.6% | Hydrothermal Method            | 42        |
| Cs <sub>2</sub> SnCl <sub>6</sub>                                   | Sb <sup>3+</sup> | 615 nm         | 8.45% | Hot-injection Method           | 57        |
|                                                                     | Sb <sup>3+</sup> | 602 nm         | 37%   | Hydrothermal Method            | 60        |
| Cs <sub>2</sub> SnI <sub>6</sub>                                    | -                | 620 nm         | 0.48% | Hot-injection Method           | 62        |

Table S3 The detailed CIE coordinate of the  $x\text{Sb}^{3+}:\text{Rb}_2\text{InCl}_5\cdot\text{H}_2\text{O}$  perovskites.

| $x\text{Sb}^{3+}:\text{Rb}_2\text{InCl}_5\cdot\text{H}_2\text{O}$ | CIE x  | CIE y  |
|-------------------------------------------------------------------|--------|--------|
| 5%                                                                | 0.4817 | 0.4468 |
| 10%                                                               | 0.4971 | 0.4346 |
| 20%                                                               | 0.5100 | 0.4405 |
| 30%                                                               | 0.4866 | 0.4428 |
| 40%                                                               | 0.4941 | 0.4434 |
| 50%                                                               | 0.4869 | 0.4441 |
| 60%                                                               | 0.4878 | 0.4440 |

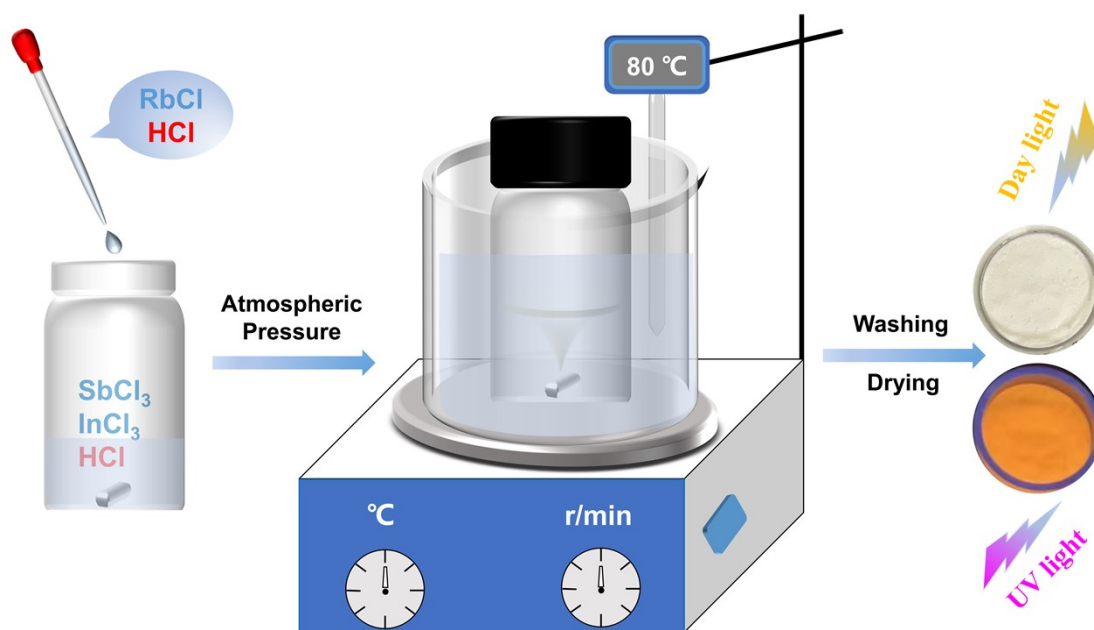

Figure S1. Schematic illustration showing the preparation procedure of  $\text{Sb}^{3+}:\text{Rb}_2\text{InCl}_5\cdot\text{H}_2\text{O}$  powders.

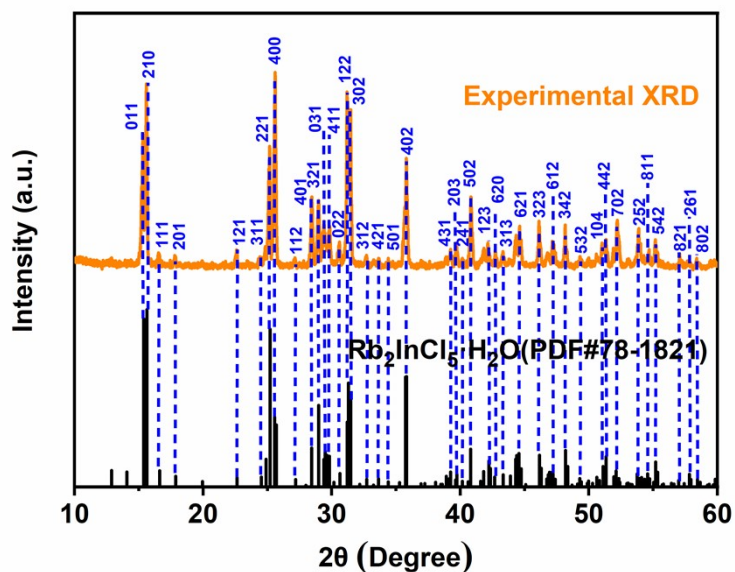

Figure S2. XRD patterns of  $\text{Rb}_2\text{InCl}_5\cdot\text{H}_2\text{O}$  samples and PDF #78-1821 from ICSD.

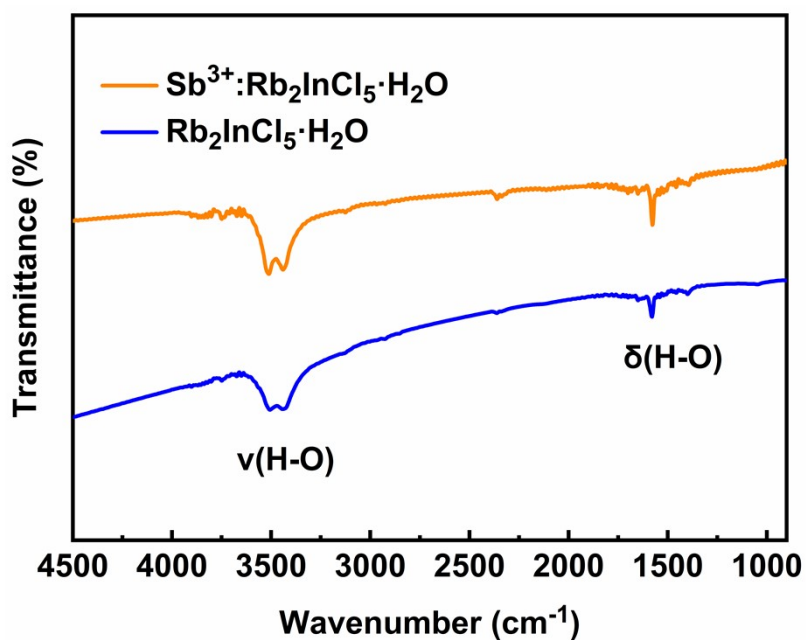

Figure S3. FTIR spectra of  $\text{Rb}_2\text{InCl}_5\cdot\text{H}_2\text{O}$  and  $\text{Sb}^{3+}:\text{Rb}_2\text{InCl}_5\cdot\text{H}_2\text{O}$ .

The broad absorption peak from 3000 to 3600  $\text{cm}^{-1}$  is ascribed to the H-O stretching vibration ( $\nu_{\text{H-O}}$ ), and the narrow absorption peak in the range of 1500 - 1600  $\text{cm}^{-1}$  is attributed to the H-O bending vibration ( $\delta_{\text{H-O}}$ ). The result confirms that the

presence of the coordinating water in  $\text{Rb}_2\text{InCl}_5 \cdot \text{H}_2\text{O}$  and  $\text{Rb}_2\text{InCl}_5 \cdot \text{H}_2\text{O} : \text{Sb}^{3+}$ , also consistent with the previous report.<sup>1,2</sup>

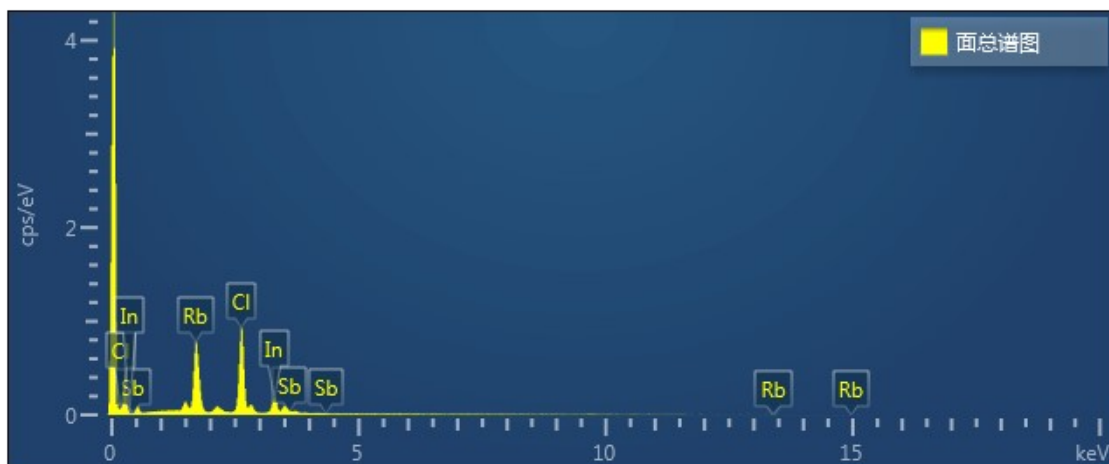

Figure S4. EDS spectrum of  $40\% \text{Sb}^{3+} : \text{Rb}_2\text{InCl}_5 \cdot \text{H}_2\text{O}$  powders, showing the elements of Rb, In, Cl, and Sb in the powders.

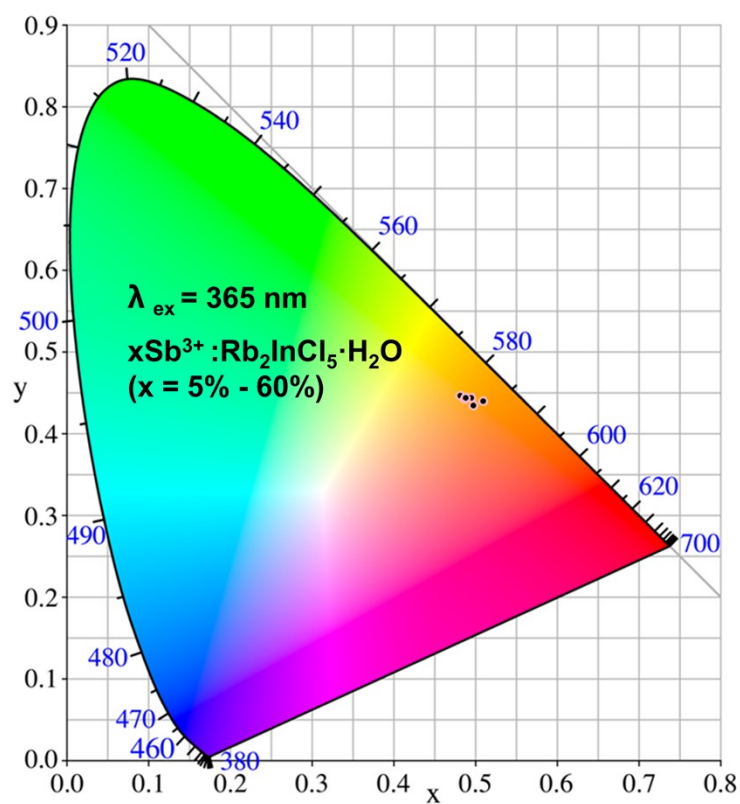

Figure S5. CIE coordinate of  $x\text{Sb}^{3+} : \text{Rb}_2\text{InCl}_5 \cdot \text{H}_2\text{O}$  ( $x = 5\% - 60\%$ ).

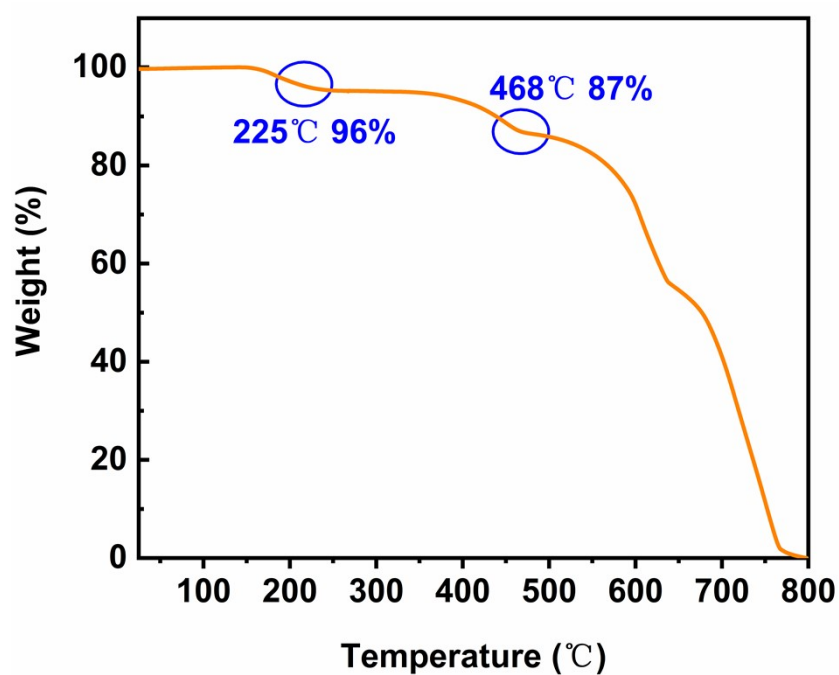

Figure S6. TGA curve of 40% $\text{Sb}^{3+}$ : $\text{Rb}_2\text{InCl}_5\cdot\text{H}_2\text{O}$ .

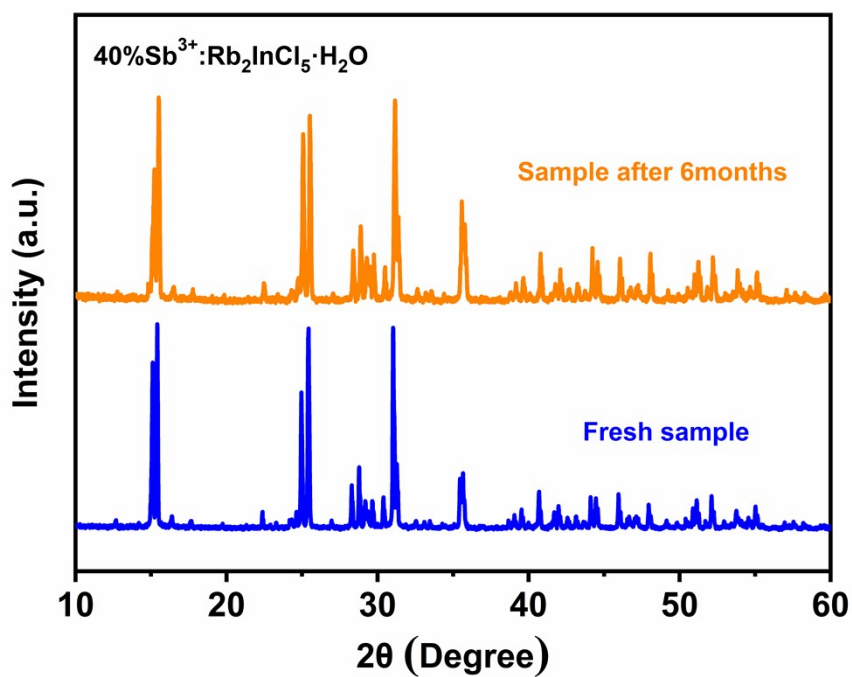

Figure S7. Comparison of the XRD patterns of 40% $\text{Sb}^{3+}$ : $\text{Rb}_2\text{InCl}_5\cdot\text{H}_2\text{O}$  fresh sample and 40% $\text{Sb}^{3+}$ : $\text{Rb}_2\text{InCl}_5\cdot\text{H}_2\text{O}$  as synthesized after six months.

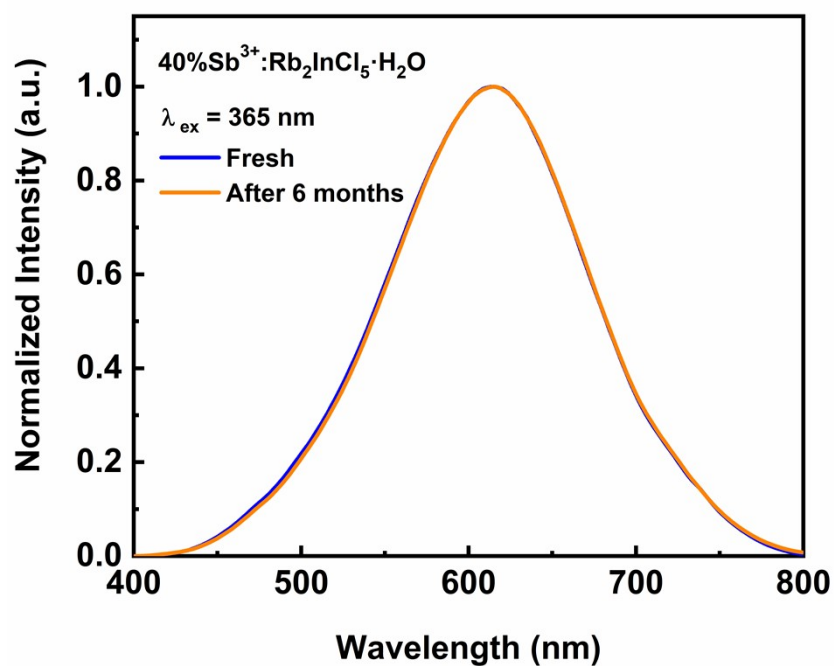

Figure S8. Normalized PL spectra of 40%Sb<sup>3+</sup>:Rb<sub>2</sub>InCl<sub>5</sub>·H<sub>2</sub>O fresh sample and 40%Sb<sup>3+</sup>:Rb<sub>2</sub>InCl<sub>5</sub>·H<sub>2</sub>O as synthesized after six months.

## Reference

- [1] L. Zhou, J.F. Liao, Z.G. Huang, J.H. Wei, X.D. Wang, W.G. Li, H.Y. Chen, D.B. Kuang, C.Y. Su, A Highly Red-Emissive Lead-Free Indium-Based Perovskite Single Crystal for Sensitive Water Detection, *Angew. Chem. Inter. Ed.* **2019**, 58, 5277-5281.
- [2] J.-H. Wei, J.-B. Luo, J.-F. Liao, W.-T. Ou, D.-B. Kuang, Te<sup>4+</sup>-doped Cs<sub>2</sub>InCl<sub>5</sub>·H<sub>2</sub>O single crystals for remote optical thermometry, *Sci. China Mater.* **2021**, 65, 764-772.
